# Supplementary material for: Serotypes, Antibiotic Susceptibility, Genotypic Virulence Profiles and SpaA Variants of Erysipelothrix rhusiopathiae Strains Isolated from Pigs in Poland
Source: MDPI journal article supplement (doi:10.3390/pathogens12030409), 2023-03-03
Supplement: s1 [file s1]

## Supplement

**Table S1.** Vaccines against swine erysipelas available in Poland.

| Name                        | Vaccine type | <i>E. rhusiopathiae</i> strains and their serotypes [according to the manufacturer's leaflet] | Producer                                                      |
|-----------------------------|--------------|-----------------------------------------------------------------------------------------------|---------------------------------------------------------------|
| Parvoerysin                 | inactivated  | 2-64 serotype 2a;<br>2-5 serotype 2a;<br>2-II serotype 2a;<br>1-203 serotype 1a               | Bioveta, Czech Republic                                       |
| Erysin Single Shot          | inactivated  | 2-64 serotype 2a;<br>2-5 serotype 2a;<br>2-II serotype 2a;<br>1-203 serotype 1a               | Bioveta, Czech Republic                                       |
| Ruvax                       | inactivated  | <i>E. rhusiopathiae</i> serotype 2                                                            | Merial S.A.S., Boehringer-Ingelheim Vetmedica, France         |
| Parvoruvax                  | inactivated  | <i>E. rhusiopathiae</i> serotype 2                                                            | CEVA-Phylaxia Veterinary Biologicals Co. Ltd., Hungary        |
| ERYSENG®                    | inactivated  | R32E11                                                                                        | Laboratorios Hipra S.A., Spain                                |
| ERYSENG® PARVO              | inactivated  | R32E11                                                                                        | Laboratorios Hipra S.A., Spain                                |
| Porcilis Ery + Parvo+ Lepto | inactivated  | M2, serotype 2                                                                                | Intervet International B.V., Netherlands                      |
| Porcilis Ery                | inactivated  | M2, serotype 2                                                                                | Intervet International B.V., Netherlands                      |
| Suibiovac Ery               | inactivated  | OV1, serotype 1<br>OV2, serotype 2                                                            | Drwalewskie Zakłady Przemysłu Bioweterynaryjnego S.A., Poland |

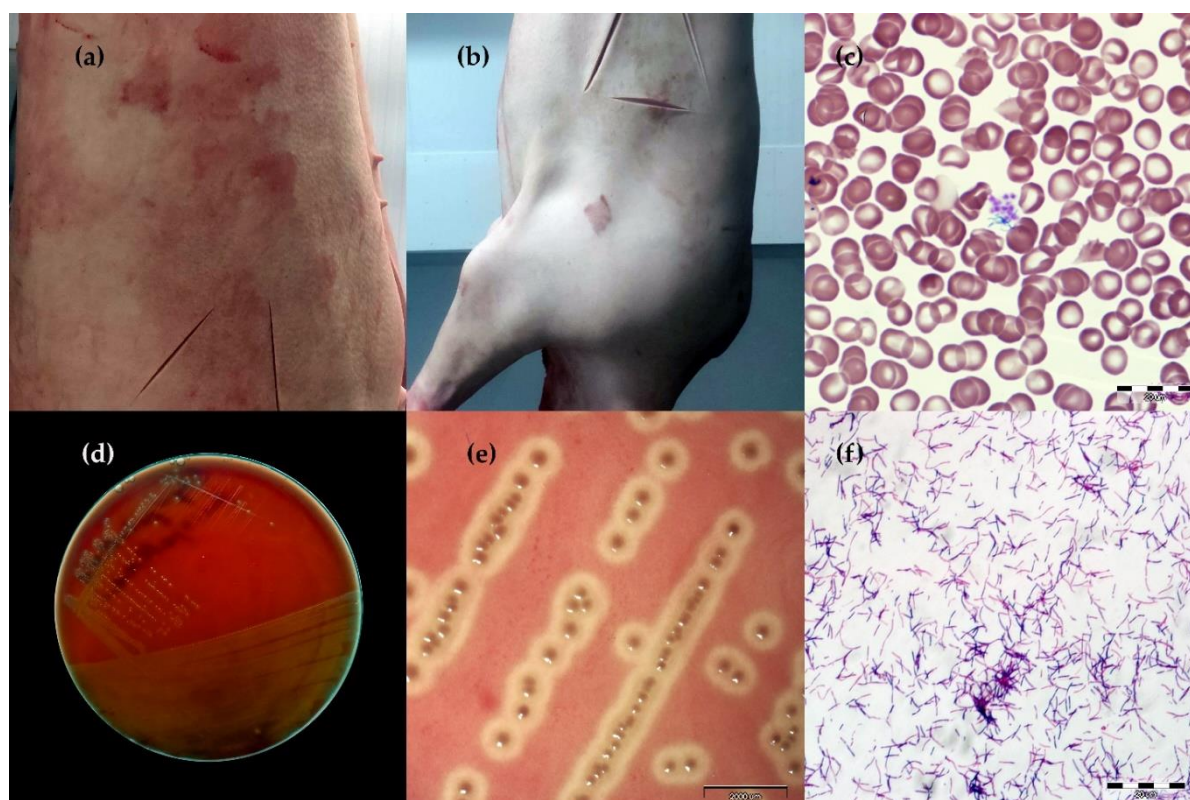

**Figure S1.** a) and b) Skin lesions seen in some pigs from which *E. rhusiopathiae* strains were isolated; c) May Grunwald Giemsa-stained blood smear of pig No. 14 – in the centre there are visible slender rods resembling *E. rhusiopathiae* (magnification 1000x); d) Culture of *E. rhusiopathiae* on blood agar; e) alpha-haemolytic activity of representative *E. rhusiopathiae* strain (10x magnification); f) *E. rhusiopathiae* morphology visualised using Gram staining (magnification 1000x, Olympus DP72 microscope).

**Table S2.** Information on pigs from which *E. rhusiopathie* strains have been isolated.

| Pig ID | Strain ID | Sero-type | Year of isolation | Clinical signs/history of disease                                                                                                                                                                                                                       | Tissues from which <i>E. rhusiopathiae</i> was isolated       | Vaccination status | Age of pig [months] | Town/ province           |
|--------|-----------|-----------|-------------------|---------------------------------------------------------------------------------------------------------------------------------------------------------------------------------------------------------------------------------------------------------|---------------------------------------------------------------|--------------------|---------------------|--------------------------|
| 1      | 1S        | N         | 2017              | the animal showed no clinical signs of disease; in the post-mortem inspection a thickening in the subcutaneous tissue was found; the pig had previously been treated with antibiotics for fever and skin lesions                                        | sections of altered subcutaneous tissue                       | unvaccinated       | 7                   | Frankamionka/ Lubelskie  |
| 2      | 2S        | 6         | 2018              | skin lesions and thickening in the subcutaneous tissue was observed                                                                                                                                                                                     | sections of altered subcutaneous tissue                       | vaccinated         | 4                   | Chojnice/ Pomorskie      |
| 3      | 3S        | 1b        | 2018              | the animal got up less often than other animals; according to the owner, there have been no confirmed cases of erysipelas on the farm before                                                                                                            | sections of altered subcutaneous tissue, tonsils              | unvaccinated       | 7                   | Gdeszyn/ Lubelskie       |
| 4      | 4S        | 1b        | 2019              | the animal showed no clinical signs of disease; in the post-mortem inspection a thickening in the subcutaneous tissue was found; there were previous cases of erysipelas in other animals on the farm, emergency treatment was used                     | sections of altered subcutaneous tissue, altered heart valves | unvaccinated       | 9                   | Gdeszyn / Lubelskie      |
| 5      | 5S        | 2         | 2019              | the animal showed no clinical signs of disease; in the post-mortem inspection a thickening in the subcutaneous tissue was found;                                                                                                                        | sections of altered subcutaneous tissue                       | vaccinated         | 5                   | Chojnice/ Pomorskie      |
| 6      | 6S        | 5         | 2019              | the animal showed no clinical signs of disease; in the post-mortem inspection a thickening in the subcutaneous tissue was found; the pigs had previously been treated with antibiotics for fever and reluctance to move and eat                         | sections of altered subcutaneous tissue                       | unvaccinated       | 9                   | Dobromierzyce/ Lubelskie |
| 7      | 7S        | 1b        | 2019              | the animal showed no clinical signs of disease; in the post-mortem inspection a thickening in the subcutaneous tissue was found; previous antibiotic treatment due to problems with the hind limbs; there were previous cases of erysipelas on the farm | fragment of skin with subcutaneous tissue and muscle fragment | unvaccinated       | 8                   | Chojnice/ Pomorskie      |

|    |     |    |      |                                                                                                                                                                                                                                                                            |                                                                           |              |    |                           |
|----|-----|----|------|----------------------------------------------------------------------------------------------------------------------------------------------------------------------------------------------------------------------------------------------------------------------------|---------------------------------------------------------------------------|--------------|----|---------------------------|
| 8  | 8S  | 8  | 2019 | in the post-mortem inspection a thickening in the subcutaneous tissue was found                                                                                                                                                                                            | fragment of the altered muscular fascia                                   | vaccinated   | 5  | Chojnice/<br>Pomorskie    |
| 9  | 9S  | 2  | 2019 | the animal showed no clinical signs of disease; in the post-mortem inspection a thickening in the subcutaneous tissue was found;                                                                                                                                           | sections of altered subcutaneous tissue and skin                          | vaccinated   | 5  | Chojnice/<br>Pomorskie    |
| 10 | 10S | 5  | 2018 | the pig had previously been treated with antibiotics due to problems with the hind limbs; there were previous cases of erysipelas on the farm                                                                                                                              | contents and fragments of the cartilages of the hock joints               | unvaccinated | 7  | Horyszów/<br>Lubelskie    |
| 11 | 11S | 1b | 2017 | no information available                                                                                                                                                                                                                                                   | synovial fluid                                                            | unvaccinated | 7  | Grabowiec/<br>Lubelskie   |
| 12 | 12S | 1b | 2018 | the animals showed no clinical signs of disease; in the post-mortem inspection a thickening in the subcutaneous tissue was found                                                                                                                                           | a single red skin lesion in the chest area along with subcutaneous tissue | unvaccinated | 10 | Chojnice/<br>Pomorskie    |
| 13 | 13S | 1b | 2018 | the animals showed no clinical signs of disease; in the post-mortem inspection a thickening in the subcutaneous tissue was found; the animals were previously treated with penicillin for fever and red skin lesions; there were previous cases of erysipelas on this farm | tonsils and a fragment of the heart with valves                           | unvaccinated | 7  | Gdeszyn/<br>Lubelskie     |
| 14 | 14S | 2  | 2022 | skin lesions have been observed                                                                                                                                                                                                                                            | fragment of a skin lesion, blood sample                                   | unvaccinated | 6  | Dortka/<br>Świętokrzyskie |

**Table S3.** Primers used for serotyping of *E. rhusiopathiae* strains.

|               | Serotype | Sequence of primers (5' to 3')                                                | Annealing temp. [°C] | Size of PCR product [bp] | Reference |
|---------------|----------|-------------------------------------------------------------------------------|----------------------|--------------------------|-----------|
| Multiplex I   | 1a       | 1a-F: CTCCTAACGCTTTAGCACGC<br>1a-R: TGA TCC TTT GCC ACT AAT GC                | 60                   | 356                      | [24]      |
|               | 1b       | 1b-F: CGAAAGCATCCCTGTAATCAGTTGC<br>1b-R: TGCCTGTAAAACCTGATCGTCTAAATC          |                      | 1357                     |           |
|               | 2        | 2F: CCACGTCTTCCACACTACAAAAAAGTAAATTC<br>2R: TCATCCTAATGCATATCATTATGTGCATATGAA |                      | 541                      |           |
|               | 5        | 5F: GCACGTTTCCAAATATTGTATCGAGTCT<br>5R: GAAATAATGCCGATAGATGGAGCACC            |                      | 194                      |           |
| Multiplex II  | 6        | 6F: CAAGGCTTGCGCGTTTGGAC<br>6R: TTCATGGCATGGTGGTGGCG                          | 60                   | 573                      | [7]       |
|               | 8        | 8F: AGCAATAAGATTGTAGATTAGCCAA<br>8R: TACCTTCCATCTAGGATAATGAAGG                |                      | 474                      |           |
|               | 9        | 9F: AGTTCCTGCAGAAACGCCTT<br>9R: TGCCTTACTGGGATAATGGG                          |                      | 1370                     |           |
|               | 15       | 15F: ACTTAGCTTCGTCGCGTTAATGGC<br>15R: TCCTGTTCCGAATGAGCATGTTTAC               |                      | 834                      |           |
|               | 21       | 21F: TGTCTGTTAATGCTATCAACGG<br>21R: ATTGTTTATGCAGGGAATTTAGG                   |                      | 325                      |           |
| Multiplex III | 4        | 4F: TCATCTTTGCTGGAACACCAACGTA<br>4R: TGTGGGKATTGGAAATTACTTCGGG                | 60                   | 311                      | [7]       |
|               | 12       | 12F: GCTTGACGTACTCAAGGTTACGAGT<br>12R: TGATCAAGTTCGTTAATTGAACCA               |                      | 453                      |           |
|               | 17       | 17F: ATACGGCTTTAGCAGGGCCA<br>17R: GTCGATGGGAGTTAACGCTG                        |                      | 640                      |           |
|               | 19       | 19F: ATTTCGTATTAGCCTCTGCAAATCCG<br>19R: TTCCAGCAAAATTTCCATCTTGGCG             |                      | 796                      |           |
|               | 23       | 23F: CCAATCTAGCATAGGATGGGAG<br>23R: ACATTCTTAGCCCAGGACCAGG                    |                      | 1082                     |           |
| Multiplex IV  | 10/11    | 10/11F: TCCGCAAGGAAACCACCGTT<br>10/11R: GTTGCAGTAGCATTTCAGTGTT                | 60                   | 293                      | [7]       |
|               | 16       | 16F: ACCATAGGTGATGCTTCAAAATCAGAACA<br>16R: TGGGTTGTTCAAACCTCACAACACAA         |                      | 1055                     |           |

**Table S4.** Primers used for detection of antimicrobial resistance genes in *E. rhusiopathiae*.

| PCR type   | Target gene                   | Primer sequence (5'→3')                               | Amplicon size (bp) | Annealing temp. (°C) | Antimicrobial substances to which the gene confers resistance | Reference          |
|------------|-------------------------------|-------------------------------------------------------|--------------------|----------------------|---------------------------------------------------------------|--------------------|
| multiplex  | <i>aac(6')-Ie-aph(2'')-Ia</i> | CAGAGCCTTGGGAAGATGAAG<br>CCTCGTGTAATTCATGTTCTGGC      | 348                | 56                   | GEN                                                           | [58-59]            |
|            | <i>aph(3')-IIIa</i>           | GGCTAAAATGAGAATATCACCGG<br>CTTTAAAAAATCATACAGCTCGCG   | 523                |                      | KAN, NEO                                                      |                    |
|            | <i>ant(4')-Ia</i>             | CAAACCTGCTAAATCGGTAGAAGCC<br>GGAAAGTTGACCAGACATTACGAA | 294                |                      | NEO, KAN, TOB                                                 |                    |
|            | <i>aph(2'')-Ib</i>            | CTTGACGCTGAGATATATGAGCAC<br>GTTTGTAGCAATTCAGAAACACCCT | 867                |                      | GEN                                                           |                    |
|            | <i>aph(2'')-Ic</i>            | CCACAATGATAATGACTCAGTTCCC<br>CCACAGCTTCCGATAGCAAGAG   | 444                |                      | GEN                                                           |                    |
|            | <i>aph(2'')-Id</i>            | GTGGTTTTTACAGGAATGCCATC<br>CCCTCTTCATACCAATCCATATAAC  | 641                |                      | GEN                                                           |                    |
| singleplex | <i>ant(6)-Ia</i>              | CGGGAGAATGGGAGACTTTG<br>CTGTGGCTCCACAATCTGAT          | 563                | 56                   | STR                                                           | [60]               |
| singleplex | <i>ant(9)-Ia</i>              | GGTTCAGCAGTAAATGGTGGT<br>TGCCACATTTCGAGCTAGGGTT       | 476                | 55                   | SPE                                                           | [60]               |
| multiplex  | <i>aadK</i>                   | GTCGCAATGAATGGTTCACGA<br>GCGATCAGTTGCCGGTATGA         | 348                | 54                   | STR                                                           | This study<br>[44] |
|            | <i>lsaE</i>                   | TGTCAAATGGTGAGCAAACG<br>TGTAACCGCTTCCTGATG            | 496                |                      | TIA                                                           |                    |
|            | <i>tetM</i>                   | GTGGACAAAGGTACAACGAG<br>CGGTAAAGTTCGTACACAC           | 406                |                      | TET                                                           |                    |
| multiplex  | <i>tetK</i>                   | GATCAATTGTAGCTTTAGGTGAAGG<br>TTTTGTTGATTACCAGGTACCATT | 155                | 60                   | TET                                                           | [61]               |
|            | <i>tetL</i>                   | TGGTGGAATGATAGCCCATT<br>CAGGAATGACAGCACGCTAA          | 229                |                      | TET                                                           |                    |
|            | <i>tetO</i>                   | AACTTAGGCATTCTGGCTCAC<br>TCCCCTGTTCCATATCGTCA         | 515                |                      | TET                                                           |                    |
|            | <i>ermA</i>                   | CCCGAAAAATACGCAAAATTTTCAT<br>CCCTGTTTACCCATTTATAAACG  | 590                |                      | MACR, LIN                                                     |                    |
|            | <i>ermB</i>                   | TGGTATTCCAAATGCGTAATG<br>CTGTGGTATGGCGGGTAAGT         | 745                |                      | MACR, LIN                                                     |                    |
|            | <i>mefA/E</i>                 | CAATATGGGCAGGGCAAG<br>AAGCTGTTCCAATGCTACGC            | 317                |                      | MACR, LIN                                                     |                    |
| singleplex | <i>lnuB</i>                   | CCTACCTATTGTTTGTGGAA<br>ATAACGTTACTCTCCTATTC          | 925                | 50                   | LIN                                                           | [62]               |
| singleplex | <i>Int-Tn (Tn916/Tn1545)</i>  | GCGTGATTGTATCTCACT<br>GACGCTCCTGTTGCTTCT              | 1028               | 53                   | transposon                                                    | [51]               |
| singleplex | <i>gyrA</i>                   | TCGTCTCCTATGCCATGTCTG<br>AGTAAAAGTGCCCCTGTTGGA        | 613                | 54                   | ENR                                                           | This study         |

Legend: TET = tetracycline; MACR – macrolides; LIN – lincosamides; TIA – tiamulin; ENR – enrofloxacin; STR – streptomycin; SPE – spectomycin; GEN = gentamicin; KAN – kanamycin; NEO – neomycin;

**Table S5.** Bacterial strains used as positive controls for the detection of resistance genes.

| Strain                                  | Resistant gene                                | Accession no. GenBank        |
|-----------------------------------------|-----------------------------------------------|------------------------------|
| <i>Enterococcus faecalis</i> 140        | <i>tetO</i>                                   | MK091469.1                   |
| <i>Erysipelothrix rhusiopathiae</i> 819 | <i>lnuB</i>                                   | MW428252                     |
| <i>Lactobacillus salivarius</i> 3aI     | <i>tetL</i> , <i>tetM</i> , <i>ermB</i>       | MK077521, MK077522, MK077523 |
| <i>Lactobacillus salivarius</i> 5aI     | <i>ant(6)-Ia</i>                              | MK091477                     |
| <i>Lactobacillus salivarius</i> 27eCh   | <i>aph(2'')-Ic</i>                            | MK091471                     |
| <i>Lactobacillus salivarius</i> Ch3a    | <i>lsaE</i>                                   | KY924692                     |
| <i>Enterococcus faecium</i> EC254       | <i>mefA/E</i>                                 | MN548247                     |
| <i>Enterococcus faecalis</i> 3W         | <i>aph(3')-IIIa</i> , <i>ant(4')-Ia</i>       | MK091474, MK091473,          |
|                                         | <i>aac(6')-Ie-aph(2'')-Ia</i> , <i>int-Tn</i> | MK091475, MK091481           |
| <i>Enterococcus faecium</i> 60          | <i>aph(2'')-Id</i>                            | MK091472                     |

**Table S6.** Primers used for detection of virulence-associated genes in *E. rhusiopathiae* strains.

| Gene/ locus tag<br>AP012027.1           | Gene product                                                | Primer sequence (5' – 3')                             | Position in genome of <i>E. rhusiopathiae</i> Fujisawa, Acc. No. AP012027.1 | Annealing temp. [C] | Size [bp] | Reference  |
|-----------------------------------------|-------------------------------------------------------------|-------------------------------------------------------|-----------------------------------------------------------------------------|---------------------|-----------|------------|
| <i>spaA</i> , <i>spaB</i> , <i>spaC</i> | Surface protection antigen A                                | <i>spaABC</i> -F:<br>ATGAAAAAGAAAAACACCTATT<br>CCG    | 112931 to 112957                                                            | 56<br>multiplex     | –         | [30]       |
| <i>spaA</i><br>ERH_0094                 | Surface protection antigen A                                | <i>spaA</i> -R: GCGATTTCTCCGCATAGCA                   | 113725 to 113743                                                            |                     | 813       |            |
| <i>spaB</i>                             | Surface protection antigen B                                | <i>spaB</i> -R:<br>CAATACCCTTTAGAGCCTCAACCA           | Not applicable                                                              |                     | 904       |            |
| <i>spaC</i>                             | Surface protection antigen C                                | <i>spaC</i> -R:<br>TGCCTCAACTACGGTTTGATACG            | Not applicable                                                              |                     | 1011      |            |
| <i>nanH.1</i> /<br>ERH_0299             | Neuraminidase                                               | F: GGAGTGCCAGAAGGTACTTGG<br>R: TGAAGGATGCAGCGGATCAA   | 332530 to 332550<br>332768 to 332749                                        | 56                  | 239       | This study |
| <i>nanH.2</i><br>ERH-0761               | Neuraminidase                                               | F: CGTATGGGTGCTGTTGCTTG<br>R: GCATGGCTTAGTGGCTACCT    | 803050 to 803069<br>803981 to 803962                                        | 55                  | 932       | This study |
| <i>cpsA</i> /<br>ERH_0157               | Glycosyl transferase, capsule polysaccharide synthesis gene | F: ATGCGGATGTGCTTTTAGCG<br>R: GCAACTCTCCTTCACCTGCT    | 186420 to 186439<br>186685 to 186704                                        | 55                  | 285       | This study |
| ERH_1356                                | ABC transporter, metal-binding lipoprotein                  | F: ATGCTTGCAGGGTGTCACT<br>R: TGCTTTCAGTTGGCTCAC       | 1418969 to 1418987<br>1418332 to 1418350                                    | 53                  | 656       | This study |
| <i>intI</i><br>ERH_1472                 | Internalin-like protein                                     | F: ACAGTTTCGGATACTTCCGG<br>R: GCTGGTAAATATGACGAGGGT   | 1556207 to 1556226<br>1556515 to 1556535                                    | 53                  | 329       | This study |
| <i>rspA</i><br>ERH_0668                 | Rhusiopathiae surface protein A                             | F: ATCGACTGGTATTCAGTTGG<br>R: ATCACGAGACATACCGCCAA    | 701593 to 701612<br>702108 to 702127                                        | 55<br>multiplex     | 535       | [16]       |
| <i>rspB</i><br>ERH_0669                 | Rhusiopathiae surface protein B                             | F: GTGGTTCATCACACGTCCT<br>R: TGYAATTGTGAGTGCATCAGT    | 709112 to 709131<br>709582 to 709602                                        |                     | 491       |            |
| <i>algI</i><br>ERH_0402                 | Alginate-O-acetyltransferase                                | F: AGTTATCTTGGACTTGGTCC<br>R: AGATAAGTGCGTATTGATCC    | 432560 to 432579<br>431813 to 431832                                        | 50                  | 767       | This study |
| <i>sub</i><br>ERH_0260                  | Cell-envelope associated proteinase, subtilase family       | F: AAGCCTGAGATATCTGCACC<br>R: TTGTACAATTGGATGAGCCG    | 297956 to 297975<br>298164 to 298183                                        | 53                  | 226       | [16]       |
| <i>hlyA</i><br>ERH_0150                 | Hyaluronidase                                               | F: AGGATCACTTACCGCTATGG<br>R: CAGCACTCAGCATGTTCTC     | 176491 to 176510<br>177413 to 177431                                        | 53<br>multiplex     | 941       | [16]       |
| <i>fbpA</i><br>ERH_1034                 | Fibronectin-binding protein                                 | F: ATCTCGCCGCTTTTAGAACG<br>R: GCGTCTTCAACTGTTGCTTG    | 1092921 to 1092940<br>1093503 to 1093522                                    |                     | 602       |            |
| <i>hlyIII</i><br>ERH_0649               | Hemolysin                                                   | F: TACGATTGCGACAAAGTGTGCG<br>R: CAGCCTTCCCTATGTTTCCAT | 678297 to 678318<br>678820 to 678840                                        |                     | 544       |            |

**Table S7.** List of *E. rhusiopathiae* strains whose *spaA* gene sequences were used for comparative analysis and clustering.

| No. | Strain ID              | Source  | Serotype | Year of isolation | Country of isolation | GenBank Acc. No. | Reference        |
|-----|------------------------|---------|----------|-------------------|----------------------|------------------|------------------|
| 1   | NCTC 8163 (ATCC 19414) | pig     | 2        | 1950              | United Kingdom       | LR134439.1       | Unpublished data |
| 2   | R32E11                 | unknown | 2        | <1970*            | Unknown              | MZ448116         | This study       |
| 3   | Ireland                | pig     | 6        | ND                | Japan                | LC425606.1       | [33]             |
| 4   | AQ 150414              | pig     | 1a       | ND                | China                | KU214208.1       | Unpublished data |
| 5   | 422/1E1                | pig     | 1b       | ND                | Japan                | AB259653.1       | [17]             |
| 6   | C43065                 | pig     | 2        | ND                | China                | EF688017.1       | [63]             |
| 7   | Fujisawa               | pig     | 1a       | <1972             | Japan                | AP012027.1       | [9]              |
| 8   | ZJ                     | pig     | ND       | ND                | China                | CP041995.1       | [48]             |
| 9   | GD-GZ                  | pig     | 1a       | ND                | China                | KJ660060.1       | Unpublished data |
| 10  | Pecs 67                | pig     | 5        | <1992             | Japan                | AB259655.1       | [17]             |
| 11  | 759W                   | goose   | 8        | 2019              | Poland               | MZ448126         | Unpublished data |
| 12  | 1092                   | goose   | 8        | 2021              | Poland               | OM248659         | Unpublished data |
| 13  | 1023                   | goose   | 2        | 2021              | Poland               | OP822697         | Unpublished data |
| 14  | 48W                    | goose   | 5        | 2019              | Poland               | MZ448141         | Unpublished data |
| 15  | 219                    | goose   | 2        | 2020              | Poland               | MZ448138         | Unpublished data |
| 16  | 849                    | goose   | 6        | 2020              | Poland               | MZ448135         | Unpublished data |
| 17  | 49W                    | goose   | N        | 2019              | Poland               | MZ448148         | Unpublished data |
| 18  | 1S                     | pig     | N        | 2017              | Poland               | OP822679         | This study       |
| 19  | 2S                     | pig     | 6        | 2018              | Poland               | OP822680         | This study       |
| 20  | 3S                     | pig     | 1b       | 2018              | Poland               | OP822681         | This study       |
| 21  | 4S                     | pig     | 1b       | 2019              | Poland               | OP822682         | This study       |
| 22  | 5S                     | pig     | 2        | 2019              | Poland               | OP822683         | This study       |
| 23  | 6S                     | pig     | 5        | 2019              | Poland               | OP822684         | This study       |
| 24  | 7S                     | pig     | 1b       | 2019              | Poland               | OP822685         | This study       |
| 25  | 8S                     | pig     | 8        | 2019              | Poland               | OP822686         | This study       |
| 26  | 9S                     | pig     | 2        | 2019              | Poland               | OP822687         | This study       |
| 27  | 10S                    | pig     | 5        | 2018              | Poland               | OP822688         | This study       |
| 28  | 11S                    | pig     | 1b       | 2017              | Poland               | OP822689         | This study       |
| 29  | 12S                    | pig     | 1b       | 2018              | Poland               | OP822690         | This study       |
| 30  | 13S                    | pig     | 1b       | 2018              | Poland               | OP822691         | This study       |
| 31  | 14S                    | pig     | 2        | 2022              | Poland               | OQ054982         | This study       |

\* The country and period of isolation of the strain was determined on the basis of information ND – not determined
